# Supplementary material
Source: publisher site journal article supplement (https://www.dovepress.com/article/580633)
Supplement: Supplementary file 1 [file 580633_Supplementary%20Table%20S1-S4.docx]

**Table S1 Baseline characteristics of pediatric patients (<18 years)**

| **Characteristics** | **Value** |
| --- | --- |
| Characteristics  Age, yr, mean(SD)  Sex, Male, n(%) | 10.1±4.1  36(56.3) |
| Suspected cause of AGEP, n(%)  Medication  Infection  Other | 55(85.9)  5(7.8)  4(6.3) |
| Number of suspected drug, n(%)  One suspect drug on admission  ≥2 suspect drugs on admission | 48(75.0)  16(25.0) |
| Time to onset, day, median (IQR) | 1(0.75,3.5) |
| Clinical characteristics  Fever, >38℃, n(%)  Systemic involvement, n(%)  Liver damage  Renal damage | 55 (85.9)  10(15.6)  2(3.1) |
| Treatmentc, n(%)  Systemic corticosteroids  Topical corticosteroid | 40(62.5)  18(28.1) |

**Notes**: *Data are based on a sample size of 64, except where noted.

***Abbreviations:** yr, year; AGEP, acute generalized exanthematous pustulosis

**Data Presentation:** Data are expressed as number (percentage) [n (%)], or median (interquartile range) [median (IQR)] for non-normally distributed continuous variables. Normally distributed continuous variables are expressed as mean ± standard deviation [mean ± SD].

**Table S2 Latency Periods of Suspected Drugs in Pediatric patients**

| **Medication type** | **No. (%)** |
| --- | --- |
| β-lactam antimicrobials | 19(24.7) |
| Non–β-lactam antimicrobials | 20(26.0) |
| Antifungals | 1(1.3) |
| Antiviral agents | 6(7.8) |
| Antimalarial drugs | 2(2.6) |
| Analgesics | 6(7.8) |
| Antitumor agents/immunosuppressants | 1(1.3) |
| Cardiovascular system drugs | 1(1.3) |
| Contrast agent  Neuropsychiatric drugs | 1(1.3)  3(3.9) |
| Traditional Chinese Medicine  Respiratory system drugs | 4(5.2)  5(6.5) |
| Antihistamine drugs | 5(6.5) |
| Other | 3(3.9) |

**Notes**: *Patients (n = 64) may have been treated with more than one drug. The total number of drug exposures is 77.

**Table S3 Detailed breakdown of involved body sites**

| **No.** | **Site** | **Outcome** |
| --- | --- | --- |
| 1 | left abdomen started at; extended to chest, back, proximal lower limbs | Survived |
| 2 | predominantly trunk; spread to almost the entire body surface; left breast rash more dense | Survived |
| 3 | initially confined to lower extremities; then spread to back, trunk, upper extremities; lower extremities pustules predominant | Survived |
| 4 | face and neck started at; cephalocaudal spread to whole body; flexural areas worsened; face, neck, back pustules prominent | Survived |
| 5 | trunk started at; spread to back, bilateral proximal limbs | Survived |
| 6 | involving palms, legs, soles; groin area pustules dense | Survived |
| 7 | face and neck, trunk started at; spread to extremities; distal limbs developed severepurpura, edema and exudative lesions | Survived |
| 8 | upper extremities started at; rapidly spread to whole body | Survived |
| 9 | right posterior thigh started at; spread to whole body except face, neck, hands | Survived |
| 10 | whole body widespread erythema; mucosa, palms, soles not involved | Survived |
| 11 | neck, bilateral forearms, bilateral thighs, bilateral calves | Survived |
| 12 | abdomen, thighs, chest, shoulders, buttocks | Survived |
| 13 | trunk, extremities; skin folds predominant | Survived |
| 14 | trunk, extremities, hands, feet | Survived |
| 15 | right inframammary area started at; extended to left buttocks, trunk, both arms, proximal both legs; right upper abdomenwith desquamation area; progressed to neck, ears | Survived |
| 16 | left shoulder started at; spread to whole body; except scalp, palms, soles | Survived |
| 17 | initially involved extremities; with pruritic pustular eruption and erythema; spread to other sites | Survived |
| 18 | scalp started at; with pruritic pustular eruption and erythema; spread to whole body | Survived |
| 19 | face started at; with pruritic pustular eruption and erythema; spread to whole body | Survived |
| 20 | hands started at; with pruritic pustular eruption and erythema; spread to other sites | Survived |
| 21 | face started at; with pruritic pustular eruption and erythema; spread to whole body | Survived |
| 22 | face, neck started at; spread to chest, abdomen, back, shoulders, scalp, bilateral axillae and groin | Survived |
| 23 | neck, bilateral axillae | Survived |
| 24 | neck, trunk, both arms, both legs | Survived |
| 25 | trunk, extremities, skin folds | Survived |
| 26 | left breast | Survived |
| 27 | axillae, chest, abdomen started at; spread to whole body（trunk, thighs, both arms, neck, scalp, palms, soles） | Survived |
| 28 | bilateral groin started at; extended to trunk, extremities, face | Survived |
| 29 | trunk started at; rapidly spread to whole body; axillae and inframammary areafolds coalescing into plaques | Survived |
| 30 | predominantly groin | Survived |
| 31 | trunk, extremities | Survived |
| 32 | widespread distribution (site not specified) | Survived |
| 33 | chest, abdomen, back, extremities | Survived |
| 34 | left side trunk, both lower extremities（then spread to right side trunk） | Survived |
| 35 | trunk, extremities, abdomen | Survived |
| 36 | trunk, extremities | Survived |
| 37 | face, trunk, extremities, skin folds | Survived |
| 38 | face started at; spread to neck, axillae, groin | Survived |
| 39 | face started at; spread to neck, extremities, trunk, back | Survived |
| 40 | groinfolds started at; spread to trunk, extremities; photo-distributed | Survived |
| 41 | widespread over the whole body | Survived |
| 42 | face started at; extended to neck, both upper extremitiesflexural areas, dorsum of hands | Survived |
| 43 | trunk, extremities | Survived |
| 44 | chest, abdomen, back, both upper extremities, both lower extremities | Survived |
| 45 | face, neck started at; spread to trunk and other sites | Survived |
| 46 | trunk, extremities, face | Survived |
| 47 | trunk, groin, proximal thighs | Survived |
| 48 | flexural areas started at; spread to trunk, abdomen, inframammary area, axillae, groin | Survived |
| 49 | trunk, extremities and | Survived |
| 50 | trunk,, right | Survived |
| 51 | trunk, area started at; with widespread erythema | Survived |
| 52 | trunk started at; extended to extremities; headneckexcept | Survived |
| 53 | face started at; extended to 60%body surface | Survived |
| 54 | arms, groin started at; extended to trunk, extremities, scalp, palms | Survived |
| 55 | both arms, chest, abdomen, back | Died |
| 56 | face, trunk, extremitiesproximal; axillae area prominent; with mucosa | Survived |
| 57 | upper extremities, axillae, neck, face（） | Survived |
| 58 | face, chest, trunk, back, both upper extremities, both lower extremitiesproximal | Outcome not reported |
| 59 | upper arms, chest, back, buttocks, legs | Outcome not reported |
| 60 | back, abdomen, chest, upper extremities, lower extremities | Survived |
| 61 | chest, abdomen,, legs | Survived |
| 62 | trunk, extremities | Survived |
| 63 | trunk, extremities | Survived |
| 64 | whole body; except face and scalp | Survived |
| 65 | trunk, extremities | Survived |
| 66 | scalp, face, trunk, extremities | Survived |
| 67 | predominantly flexural areas | Survived |
| 68 | trunk, extremities | Survived |
| 69 | neck, trunk, face | Survived |
| 70 | trunk, extremities | Survived |
| 71 | lower extremities, forearms, trunk | Survived |
| 72 | neck, back, chest, abdomen, upper extremities | Survived |
| 73 | whole body | Survived |
| 74 | trunk, upper extremities | Survived |
| 75 | face, neck, whole body（ and extremities, palms and soles area） | Survived |
| 76 | face, trunk, forearms, both legs | Survived |
| 77 | axillae, chest, upper arms, legs | Survived |
| 78 | face, neck, trunk, extremities | Survived |
| 79 | scalp,, neck | Survived |
| 80 | face, neck, trunk（involving body surface） | Survived |
| 81 | extremities,, face | Survived |
| 82 | bilateral groin, right side abdomen, right side side arms, left side forearms | Survived |
| 83 | chest, abdomen, thighs | Survived |
| 84 | chest, abdomen, thighs | Survived |
| 85 | chest, abdomen, thighs | Survived |
| 86 | chest, abdomen, thighs | Survived |
| 87 | chest, abdomen, thighs | Survived |
| 88 | chest, abdomen, thighs | Survived |
| 89 | chest, abdomen, thighs | Survived |
| 90 | chest, abdomen, thighs | Survived |
| 91 | face | Survived |
| 92 | axillae, breast | Survived |
| 93 | face, trunk, extremities | Survived |
| 94 | face, trunk | Survived |
| 95 | face, neck, extremities, trunk | Survived |
| 96 | face, trunk, extremities | Survived |
| 97 | trunk, face, extremities | Survived |
| 98 | headneck, trunk, extremities | Survived |
| 99 | groin, axillae, buttocks, and cheekmucosa | Survived |
| 100 | trunk, extremities | Survived |
| 101 | trunk, extremities, oral cavitymucosa | Survived |
| 102 | neck, trunk, upper extremities | Survived |
| 103 | trunk, extremities | Survived |
| 104 | head, face, neck, axillae, trunk, extremities | Survived |
| 105 | scalp, ear, trunk, extremities | Survived |
| 106 | neck, trunk, extremities generalized pustules | Survived |
| 107 | neck, trunk denseblisters, pustules | Survived |
| 108 | trunk, diffuse pustules progressed to face, scalp | Survived |
| 109 | lower extremities rash spread to trunk, extremities | Survived |
| 110 | trunk generalized erythema and pustules | Survived |
| 111 | scalp, neck, trunk, extremities generalized pustules | Survived |
| 112 | face, trunk dense pustules | Survived |
| 113 | abdomen,, buttocks erythemawith pustules | Survived |
| 114 | chest, upper extremities pustules progressed to trunk, extremities, face, scalp | Survived |
| 115 | axillae, groin pustules progressed to whole body generalized pustules | Survived |
| 116 | face, trunk and upper extremities erythema; no prominentblisters. lower extremities（soles）developed confluentpurpura rash. left calveswith 2 skin; blisters | Survived |
| 117 | whole body40%erythema, plaques and papules; with with and pustules; 90% | Died |
| 118 | face, neck, trunk erythemaon background of developed non-follicular pustules | Survived |
| 119 | right pustules progressed to right side; and; whole body generalized erythema. | Survived |
| 120 | skin confined to chest and back area; and bilateral lower extremitiesfolds area; with with widespreadedema, erythema and whole body non-follicularno pustules. | Survived |
| 121 | hand,, right side erythema and purpuraskin pustules; progressed to whole body | Survived |
| 122 | thighs erythema → trunkextremities diffuse erythemawith desquamation and pustules | Survived |
| 123 | back→abdomen, extremities diffuse pustules（）; hand distal, forearms, lower extremitiestargetoid lesionswith | Survived |
| 124 | face erythema → headtrunkextremitiesproximal diffuse erythemaon background ofnon-follicular pustules | Survived |
| 125 | face, upper extremities, trunk：pruritus pustules | Survived |
| 126 | back side chest shouldersaxillaeneck diffuse erythemaedemaplaqueswith 1-2mm pustules | Survived |
| 127 | groin, axillae, trunk, face, extremitiesproximal pruritus erythemawith non-follicular pustules | Survived |
| 128 | trunk, axillae, groin, thighs erythemascaleplaqueswith non-follicular pustules | Survived |
| 129 | trunk, extremities→face erythema pustules | Survived |
| 130 | abdomen→extremities erythema pustules | Survived |
| 131 | whole body diffuse erythema pustuleswith extremitiespurpura | Survived |
| 132 | whole body pustular eruption | Survived |
| 133 | trunkextremities erythemawith dense pustules | Survived |
| 134 | face, neck and legs and erythema area developed pustules | Died |
| 135 | trunkextremitiespapules→pustuleswith desquamation | Survived |
| 136 | groin, axillae prominent; trunk, face and proximal limbs | Survived |
| 137 | trunk and groinpustular eruption | Survived |
| 138 | extremities diffuse erythema; pustules | Survived |
| 139 | trunk started at; scalp, face and extremities | Survived |
| 140 | bilateral axillae and area; with diffuseedema erythema | Died |
| 141 | face, neck, trunk started at; involved proximal limbs | Survived |
| 142 | chest started at; generalizedface, trunk and extremitiesproximal | Survived |
| 143 | started at; then extended to whole body; with edema erythema and non-follicular pustules | Survived |
| 144 | trunk and neck; with and edema; palms and soles erythema; extremitiestargetoid lesions | Survived |
| 145 | face, chest, back and arms | Survived |
| 146 | neck and bilateral started at; spread to extremities and trunk | Survived |
| 147 | axillae and groinfolds started at; then extended to chest,, lower extremities; with non-follicular pustules | Survived |
| 148 | trunk, arms and legs developed pruritus erythema; involving pustules | Survived |
| 149 | trunk, back and abdomen area erythemaskin developed no pustules | Survived |
| 150 | neck, axillae, chest, trunk and extremities2-3mmnon-follicular pustules and erythema | Survived |
| 151 | face, trunk and extremities diffuse erythema; pustulesintertriginous areas area | Survived |
| 152 | face, trunk and extremities diffuse erythema; developed pustules | Survived |
| 153 | erythemapapules, pustules and | Survived |
| 154 | face and area erythema spread to trunkextremities; with non-follicular pustules | Survived |
| 155 | trunk, neck, arms and legs side symmetricnon-follicular pustules | Survived |
| 156 | abdomen, neck and skin foldspruritus erythemapapules; then progressed to pustules | Survived |
| 157 | groin area started at; spread to trunk and proximal limbs erythemaon background of pustules | Survived |
| 158 | chest, abdomen, folds, arms and legswidespreadnon-follicular pustules | Survived |
| 159 | faceedema erythema（first episode）; then progressed totrunk and buttocks pustules, face and scalp erythemascale（） | Survived |
| 160 | skin pustules; with edema（first episode） | Survived |
| 161 | face started at; progressed to both upper extremities, chest, lower extremities pustules rash | Survived |
| 162 | pruritus erythema; whole body erythemaon background of pustules | Survived |
| 163 | face, upper extremities, trunk, thighs erythemaon background of dense pustules; lower extremitiespurpura | Survived |
| 164 | face, back, chest, upper extremitiesedema erythemaon background ofwidespread pustules; thighspapules | Survived |
| 165 | face and whole body erythema, papules and plaques; whole body erythemaon background ofnon-follicular pustules; lower extremitiestargetoid lesions | Survived |
| 166 | face, axillaefolds, trunk dense pustules | Survived |
| 167 | back, abdomen, buttocks, thighs diffuse confluent erythema; developed thighs side, buttocks dense pustules | Survived |
| 168 | whole body erythemaon background of dense pustules; neck and groin | Survived |
| 169 | extremities erythemaon background of1-2mmno pustules | Survived |
| 170 | flexural areas predominant generalized erythemaon background of densepinhead-sized pustules | Survived |
| 171 | neck, face started at; spread to extremities and trunk; symmetric confluent erythemawith non-follicular pustules | Survived |
| 172 | whole body generalized erythemaon background ofpapules and pustules; scaleplaques | Survived |
| 173 | trunkextremities erythemawith <5mmnon-follicular pustules; left hand edema | Survived |
| 174 | groin; spread to whole body（folds） | Survived |
| 175 | calves side papules→2 days generalizedwhole body with face; non-follicular pustules; lower extremitiesannularpurpuratargetoid lesions | Survived |
| 176 | neck erythema→2 days spread to trunkaxillae→3 days neck trunkarmsthighs developed 1mm pustules | Survived |
| 177 | generalized pustules erythema | Survived |
| 178 | upper extremitiesflexural areas and face started at →extended to trunk, upper extremities and thighs | Survived |
| 179 | trunk and extremitiesproximal symmetric erythemawith pustules | Survived |
| 180 | back started at →spread to scalp, face, chest abdomen | Survived |
| 181 | head, folds, trunk confluent erythemaedemaplaqueswith purpura; 15%body surfaceskin | Survived |
| 182 | chest, face, neck pustules, arms, chest, legs, palmseruptioneruption,, legs, palmsedema | Survived |
| 183 | face, trunk, upper extremities erythemaedemaon background of pustules, buttocks, thighs, calveswith pustules | Survived |
| 184 | axillae, groin erythemaon background ofnon-follicular pustules, thighs, area purpura and, flankabdomenblisters | Survived |
| 185 | erythemaon background of confluent pustules（ neck, axillae dense）;, right distal blisters and desquamation | Survived |
| 186 | face, trunk, dorsum of hands, arms, thighs, calves（ area worsened）, oral cavitymucosa and pustules | Survived |
| 187 | >80%skin （face, scalp）widespread erythemawith non-follicular pustules, tonguehead | Survived |
| 188 | buttocks→back, chest, face, neck, lower extremities, trunk and proximal limbspurpura, cheekmucosa pustules | Survived |
| 189 | neck, shoulders, trunk, upper arms, thighsproximal, erythemaon background of pustules | Survived |
| 190 | neck→chest, arms, papules coalescing into plaqueswith non-follicular pustules and desquamation | Survived |
| 191 | face, neck, chest, back, trunk, extremitiesnon-follicular pustules, oral cavitymucosa | Survived |
| 192 | right breast erythemawith non-follicular pustules | Survived |
| 193 | first episode：right side facedorsum of hands pustules and blisters, ：bilateral face, chest, axillae, breast, abdomen | Survived |
| 194 | face, neck, chest erythema pustules | Survived |
| 195 | face（both cheek, ear, ）erythema pustuleswith | Survived |
| 196 | abdomen, palms, side pustules | Survived |
| 197 | face densenon-follicular pustules | Survived |
| 198 | thighs erythemawith non-follicular pustules | Survived |
| 199 | face developed erythema pustules | Survived |
| 200 | hand pustules; spread to left hand, arms, back, trunk, face, scalp, lower extremities | Survived |
| 201 | chest; spread to entire chest, abdomen, back, shoulder, neck, scalp, bilateral breast | Survived |
| 202 | area pustules;; bilateral axillae area | Survived |
| 203 | face, trunk, legs generalized erythema area pustules | Survived |
| 204 | （arms and legs）developed edemaplaqueswith pinhead-sizedno pustules; not involved | Survived |
| 205 | diffuse erythemawith confluent pustules; involved neck and axillaeflexural areas area | Survived |
| 206 | trunk predominant; involved neck, face, arms, axillae and neckfolds; erythemaon background of generalized pustules | Survived |
| 207 | axillae, groinfolds, lower extremities, neck, chest and face diffuse erythema; groinfolds developed pustules | Survived |
| 208 | lower extremities; widespread confluent erythemaplaqueswith non-follicular pustules | Survived |
| 209 | head, neck, trunk, extremitieswidespread erythemawith skin | Survived |
| 210 | face, trunk, extremities diffuse erythemawith pinhead-sized pustules | Survived |
| 211 | flexural areas predominant：abdomen, groin, thighs, buttocks, upper arms, axillae, non-follicular pustules | Survived |
| 212 | trunk, extremitiesproximal erythemawith annular pustules; abdomen pustules | Survived |
| 213 | trunk, back, extremities pustules | Survived |
| 214 | face, trunk, extremities（flexural areas）pustules | Survived |
| 215 | face, trunk, back, extremities pustules | Survived |
| 216 | generalizedpustular eruption; erythemaon background of pustules; predominantly intertriginous area | Outcome not reported |
| 217 | trunk and with proximal limbs erythema non-follicularpustular eruption | Survived |
| 218 | neck, abdomen rash spread to face,, neck side and abdomennon-follicular pustules, faceedema, erythemapapules coalescing into plaquesface, trunk, arms, thighs | Survived |
| 219 | generalized rash; developed pustulesdesquamation | Outcome not reported |
| 220 | generalized erythema rash; with non-follicularhead pustules; folds area worsened | Outcome not reported |
| 221 | edema erythemaon background of pustular eruption; intertriginous areas area （, axillae, groin）; rapidly30%body surface | Died |
| 222 | trunk and extremities diffuse erythema; bilateral thighs pustules | Survived |
| 223 | trunk, proximal limbs and folds erythemaon background of pustules; then progressed to54%skin erythemawith | Survived |
| 224 | whole body erythema confluent pustules; predominantly intertriginous area（axillae, folds, groin, thighs side ） | Survived |
| 225 | foldspruritus rashwith pinhead-sized pustules | Survived |
| 226 | trunk and arms erythema progressed to whole body; trunk and lower extremitiesnon-follicular pustules | Survived |
| 227 | bilateral arms, axillae, legs, buttocks and groin diffuse erythemapustular eruption | Survived |
| 228 | abdomen, back and extremitieswidespread erythema; edemaplaques developed non-follicular pustules | Survived |
| 229 | generalizedpruritus erythemapapulespustular eruption | Survived |
| 230 | face, neck, trunk and extremitiespruritus generalizedpapules; intertriginous areas area developed non-follicular pustules | Survived |
| 231 | left forearms2 cmplaques; and erythemapapules; progressed to extremities pustules rash | Survived |
| 232 | trunk and skin foldsnon-follicular pustules | Survived |
| 233 | trunkpapules; neck and folds erythemaon background of,, non-follicular pustules | Survived |
| 234 | back erythemawith non-follicular pustules and; arms, chest and abdomen generalized erythemapapules | Survived |
| 235 | chest, back, proximal limbs generalizedpruritus rash; groin and thighswith non-follicular pustules | Survived |
| 236 | face, trunk and upper extremities generalizedpruritus erythemawith and pustules | Survived |
| 237 | neck, axillae and groin area erythemaon background ofhead pustuleswith desquamation | Survived |
| 238 | axillae area erythemaon background of pustules; rapidly progressed to upper extremities and lower extremities; head pustules | Survived |
| 239 | left flank rash spread to chest, back and proximal lower limbs | Survived |
| 240 | trunkextremitieswidespread erythema pustules; thighs, groin, upper extremities and axillae pustules | Survived |
| 241 | distal limbspurpura→trunkproximal non-follicular pustules（involved 60%body surface） | Survived |
| 242 | whole body generalizednon-follicular pustules | Survived |
| 243 | upper extremities, trunk erythema pustules | Survived |
| 244 | axillae→trunk and proximal limbs erythema; folds and neck erythemaon background ofnon-follicular pustules | Survived |
| 245 | not reported | not reported |
| 246 | not reported | not reported |
| 247 | not reported | not reported |
| 248 | not reported | not reported |
| 249 | not reported | not reported |
| 250 | not reported | not reported |
| 251 | not reported | not reported |
| 252 | not reported | not reported |
| 253 | not reported | not reported |
| 254 | not reported | not reported |
| 255 | not reported | not reported |
| 256 | not reported | not reported |
| 257 | not reported | not reported |
| 258 | not reported | not reported |
| 259 | not reported | not reported |
| 260 | not reported | not reported |
| 261 | not reported | not reported |
| 262 | not reported | not reported |
| 263 | not reported | not reported |
| 264 | back, chest, upper extremitiesedema erythemaplaquesinvolving widespreadnon-follicular pustules; axillae, groin, trunk | Survived |
| 265 | face, trunk, proximal limbs pustules; lower extremitiespurpura | Survived |
| 266 | flexural areas area non-follicular pustuleswith diffuse erythema | Survived |
| 267 | flexural areas area pustules and | Survived |
| 268 | trunk, limbs, facewidespreadnon-follicular pustules, scalpplaqueswith and | Survived |
| 269 | flexural areas area and abdomen rash spread to face, chest and extremities; confluent erythemawith widespread pustules | Survived |
| 270 | scalp, trunk and both thighswidespread erythemaplaqueswith non-follicular pustules, and | Survived |
| 271 | face, abdomen, back, forearms and thighswidespreadpapules, pustules, and scale | Died |
| 272 | trunk and lower extremities erythemawith pustules | Survived |
| 273 | chest, upper extremities, face and trunk diffusepapuleswith non-follicular pustules; skin foldswith desquamation; bilateral pustules | Survived |
| 274 | flexural areas areapruritus pustules rashwith erythema; spread to whole body | Survived |
| 275 | erythemaedemaskin widespreadnon-follicular pustules | Survived |
| 276 | flexural areas areapruritus pustules rashwith erythema; spread to whole body | Survived |
| 277 | axillae erythemapapulespruritus rashwith non-follicular pustules; spread to whole body | Survived |
| 278 | erythemaedemaskin widespreadnon-follicular pustules | Survived |
| 279 | scalppruritus pustules rashwith erythema; spread to whole body | Survived |
| 280 | facepruritus pustules spread to whole body | Survived |
| 281 | neck, extremities, trunk diffuse erythemawith 1-2mmnon-follicular pustules | Survived |
| 282 | trunk, proximal limbs, buttocks erythema pustules, palms and solesdesquamation | Survived |
| 283 | trunk, extremities pustuleswith desquamation and plaques | Survived |
| 284 | trunk, extremities, face confluent erythemawith pustules | Survived |
| 285 | intertriginous areas; spread to whole body | Survived |
| 286 | bilateral upper extremities, lower extremities, back, trunk, groin erythema pustules(body surface40%) | Survived |
| 287 | trunkextremitiesdesquamationwith erythemanon-follicular pustules; bilateral lower extremitiesedema | Survived |
| 288 | trunk and legs erythemawith targetoid lesions; 7 days trunk developed non-follicular pustules,, neck, oral cavitymucosa and widespread | Survived |
| 289 | facerapidly extended to whole body erythemawith pinhead-sized pustules | Survived |
| 290 | trunk | Survived |
| 291 | trunk and extremities generalized pustules | Survived |
| 292 | face, ear, trunk, arms, intertriginous areas area（groin, axillae）tongue | Survived |
| 293 | left, left upper arms, left side chest | Survived |
| 294 | trunk, proximal arms and thighs, thighs side, axillae | Survived |
| 295 | area：face, neck, dorsum of hands | Survived |
| 296 | area：face spread to whole body; involving area not involved | Survived |
| 297 | folds, thighsproximal | Survived |
| 298 | trunk, buttocks, proximal | Survived |
| 299 | widespread erythema pustules→10 days developed targetoid lesions | Survived |
| 300 | pustular eruption, erythroderma | Survived |
| 301 | face, axillae→trunk, proximal extremities | Survived |
| 302 | trunk; axillae | Survived |
| 303 | whole body60%body surface erythemaon background ofnon-follicular pustules | Survived |
| 304 | whole body confluentedema erythemawith widespreadnon-follicular pustules（ chest,, extremitiesflexural areas） | Survived |
| 305 | face, chest, upper extremities erythemaedemaplaqueswith pustules | Survived |
| 306 | back, chest, upper extremitiesintertriginous areas erythemaedemaplaqueswith pustules, thighs | Survived |
| 307 | whole body erythemaon background ofnon-follicularno pustules | Died |
| 308 | arms, face; spread to scalp, back, chest and whole body | Survived |
| 309 | Site not reported | Outcome not reported |
| 310 | Site not reported | Outcome not reported |
| 311 | back→whole body generalized; palms erythema; soles not involved | Survived |
| 312 | scalp, cheek, trunk, extremities, axillae generalized pustules and erythemaplaques | Survived |
| 313 | whole body symmetric erythemapapuleswith pustulesblisters; thighsblisters; legspurpura | Survived |
| 314 | abdomen→ chest, neck, shoulder, generalizededemapapulesplaques; mucosa | Survived |
| 315 | trunk, neck and extremities erythemaedemaplaques developed non-follicular pustules; with desquamation | Survived |
| 316 | face and neck started at; spread to trunk and other sites | Survived |
| 317 | face, scalp and back erythemaedemawith no pustules | Survived |
| 318 | chest started at; then extended to extremities, neck, ears, area | Survived |
| 319 | 90%body surfaceinvolving pustules（trunk predominant） | Survived |
| 320 | face started at; rapidly spread to trunk and extremities | Survived |
| 321 | breast started at; extended to abdomen, neck, chest | Survived |
| 322 | whole body bilateral; face, trunk, upper extremities, lower extremities, neck and axillae | Survived |
| 323 | face, trunk, and extremities | Survived |
| 324 | thighs→abdomenblisters→face, abdomen, upper extremities（>20%body surface） | Survived |
| 325 | trunk predominant; generalized erythemawith no pustules | Survived |
| 326 | trunk and extremitieswidespread erythemawith pustules | Survived |
| 327 | widespread erythemaplaqueswith non-follicularno pustules | Survived |
| 328 | whole body50%body surfaceplaquesnon-follicular pustules | Survived |
| 329 | abdomen and both thighs erythema and pustules | Survived |
| 330 | cheek, neck, and ear area developed confluent erythemawith pustules; back and face diffuseeruption | Survived |
| 331 | face, chest, abdomen, back, extremitieswidespread erythemapapules coalescing into plaques; with non-follicular pustules | Survived |
| 332 | intertriginous areas area; then extended to entire trunk, lower extremities; involved 45%body surface | Survived |
| 333 | 90%body surface diffuse erythemapustular eruption; pustulesintertriginous areas area | Survived |
| 334 | trunk and extremities erythemawith pustules;; then spread to trunk and extremities | Survived |
| 335 | area diffuse pustules and erythema | Survived |
| 336 | face, neck, upper extremities, trunk erythemaon background ofpustular eruption; oral cavity and tonguehead | Survived |
| 337 | face（edema erythema+non-follicular pustules）→trunk, axillae | Survived |
| 338 | abdomen erythema; erythemawith no pustules; confined to axillae and groinintertriginous areas | Survived |
| 339 | intertriginous areas area erythema→neckpinhead-sizednon-follicular pustules | Survived |
| 340 | upper extremities, trunk, back erythemaon background of pustules; face | Survived |
| 341 | and face started at; 2 days spread to trunk and legs | Survived |
| 342 | whole body pustules | Survived |
| 343 | whole body blisters pustules（erythemaon background of） | Survived |
| 344 | trunk and extremitieswidespreadnon-follicular pustuleswith desquamation | Survived |
| 345 | extremities and backpruritus rash→pustules | Survived |
| 346 | whole body generalized pustules（AGEPDRESS） | Survived |
| 347 | whole body generalized pustules | Survived |
| 348 | whole body generalized pustules | Survived |
| 349 | whole body generalized pustules | Survived |
| 350 | whole body generalized pustules | Survived |
| 351 | whole body generalized pustules | Survived |
| 352 | whole body generalized pustules | Survived |
| 353 | face and neck started at; then spread to whole body; palmswith pustules; hand; lower extremitieswith | Survived |
| 354 | neck chest started at; rapidly spread to whole body, extremitiesnon-follicular pustules（2-3mm）; neck scalptrunk confluentplaqueswith desquamation | Survived |
| 355 | face and arms started at; then spread to whole body | Survived |
| 356 | trunk and extremitiesplaques; involving non-follicular pustules | Survived |
| 357 | abdomenprurituspapules; 2 days spread to whole body（except palms and solesmucosa）; erythemaon background ofnon-follicular pustules | Survived |
| 358 | headabdomen started at →armslegs, facetrunkextremities confluent erythema, chest thighsno non-follicular pustules（1-2mm）, backdesquamation（Nikolsky）, trunklegspalmsplaques | Survived |
| 359 | face and arms started at; then spread to whole body | Survived |
| 360 | whole body widespreadedema erythema; involving no non-follicular pustules; palms | Survived |
| 361 | axillae→whole body diffusenon-follicular pustules（faceabdomenextremities）, targetoid lesions+purpura | Survived |
| 362 | whole body40%erythema→90%with pustules | Survived |
| 363 | groin area eruption and erythema; spread to, abdomen, axillae; extremities; with; and groin area no no pustules | Survived |
| 364 | bilateral lower extremitiesannular erythemawith pustules→whole body generalized | Died |
| 365 | and groin area started at; involved legs, abdomen, buttocks, neck erythemaedemaplaqueswith non-follicular pustules | Survived |
| 366 | whole body erythema; face→trunk and extremitiesno pustules and papules. | Survived |
| 367 | neck→face, back, chest pustules | Survived |
| 368 | face→chest, back, proximal limbs pustules | Survived |
| 369 | face, neck, trunk | Survived |
| 370 | cheek and erythemaon background of pustules; then extended to and neck | Survived |
| 371 | extremities | Survived |
| 372 | cheek（）developed pustules | Survived |
| 373 | Site not reported | Survived |
| 374 | chest and back erythemapustular eruption | Survived |
| 375 | （1-2mmnon-follicular pustules） | Survived |
| 376 | headnecknon-follicular pustules（） | Survived |
| 377 | trunk and proximal limbsno erythemaedemaplaques; pinhead-sizednon-follicular pustules | Survived |
| 378 | back and neck side symmetric developed non-follicular pustules | Survived |
| 379 | face, scalp, oral cavitymucosa（non-follicular pustules） | Survived |
| 380 | cheek and erythemaon background of pustules | Survived |
| 381 | facetrunkproximal limbs diffuse erythemaon background of pustules（4mm） | Survived |
| 382 | face and neck densenon-follicular pustules | Survived |
| 383 | bilateral cheek erythemaon background ofsymmetric pustules | Survived |
| 384 | upper extremities and lower extremities erythemaon background of non-follicular pustules; trunk | Survived |
| 385 | cheek pustules | Survived |
| 386 | groin area →whole body | Survived |
| 387 | whole body pruritus rashwith pustules | Survived |
| 388 | ：trunk predominant; bilateral and abdomen, ：abdomen, back, bilateral lower extremities | Survived |
| 389 | neck and bilateral axillae started at; whole body | Survived |
| 390 | whole body erythemaedemaon background ofnon-follicular pustules; flexural areas started at desquamation | Survived |
| 391 | trunkextremities; desquamation and whole body | Survived |
| 392 | arms, legs, abdomen, chest, palms and; groin and thighs side prominent | Survived |
| 393 | area started at; generalized erythemaedema rashwith pustules; involved whole body（except palms and solesmucosa） | Survived |
| 394 | Site not reported | Survived |
| 395 | Site not reported | Survived |
| 396 | Site not reported | Survived |
| 397 | Site not reported | Survived |
| 398 | whole body | Survived |
| 399 | neck, abdomen, back, axillae, groin, extremities | Survived |
| 400 | face, neck,, trunk, extremities | Survived |
| 401 | face, chest, neck, folds, extremities, trunk | Survived |
| 402 | trunk, buttocks, lower extremities | Survived |
| 403 | trunk, extremities, back | Survived |
| 404 | chest, both upper extremities, ear, neck, face, extremities, trunk, abdomen, bilateral groin | Survived |
| 405 | trunk, extremities, chest back | Survived |
| 406 | headface, neck, axillae, breast, abdomen, back, thighs, both armsforearms | Survived |
| 407 | neck, trunk, extremities, abdomen | Survived |
| 408 | neck, chest, left forearms, extremities, trunk, headface | Survived |
| 409 | neck, trunk, extremities | Survived |
| 410 | right upper extremities, trunk, extremities | Survived |
| 411 | face, neck, trunk, whole body | Survived |
| 412 | trunk, extremities | Survived |
| 413 | extremities, trunk | Survived |
| 414 | headface, neck, extremities, trunk | Survived |
| 415 | left side shoulders, neck, trunk, extremities | Survived |
| 416 | neck, trunk, extremitiesproximal, both calves, forearms, hand | Survived |
| 417 | head, neck,, extremities | Survived |
| 418 | axillae, groin, ear,, chest | Survived |
| 419 | whole body | Survived |
| 420 | whole body | Survived |
| 421 | whole body | Survived |
| 422 | whole body | Survived |
| 423 | whole body | Survived |
| 424 | extremities | Survived |
| 425 | neck, extremities | Survived |
| 426 | trunk, extremities | Survived |
| 427 | whole body; trunk pustules; both lower extremitiespurpura | Survived |
| 428 | trunkbuttocks, thighs side | Survived |
| 429 | diffuse erythema; both upper extremities pustules | Survived |
| 430 | neck, trunk, extremities | Survived |
| 431 | trunk, extremities | Survived |
| 432 | trunk, extremities | Survived |
| 433 | trunk, extremities | Survived |
| 434 | trunk, extremitiesproximal, face | Survived |
| 435 | left, face, neck, trunk, extremities | Survived |
| 436 | Site not reported | Survived |
| 437 | Site not reported | Survived |
| 438 | Site not reported | Survived |
| 439 | Site not reported | Survived |
| 440 | Site not reported | Survived |
| 441 | Site not reported | Survived |
| 442 | Site not reported | Survived |
| 443 | Site not reported | Survived |
| 444 | Site not reported | Survived |
| 445 | neck, trunk,, buttocks, extremities, axillae, groin, both calves | Survived |
| 446 | face, trunk, extremities, both dorsum of hands | Survived |
| 447 | neck, trunk, axillae,, groin | Survived |
| 448 | side, extremities, trunk | Survived |
| 449 | face, trunk, extremities, both lower extremities, right lower extremities | Survived |
| 450 | abdomen, face, both lower extremities, whole body | Survived |
| 451 | head,, trunk, extremities | Survived |
| 452 | thighs side and side, back | Survived |
| 453 | neck, face, chest,,, extremities,, bilateral buttocks, thighs | Survived |
| 454 | axillae, whole body | Survived |
| 455 | axillae, whole body | Survived |
| 456 | both forearms, palms and soles,, whole body, face | Survived |
| 457 | bilateral axillae, trunk, extremitiesproximal, neck, both flank | Survived |
| 458 | both calves, whole body, axillae, neck, upper extremitiesproximal | Survived |
| 459 | Site not reported | Survived |
| 460 | trunkextremities | Survived |
| 461 | face trunk extremities | Survived |
| 462 | whole body | Survived |
| 463 | trunkextremities | Survived |
| 464 | trunkextremities | Survived |
| 465 | whole body | Survived |
| 466 | trunk | Survived |
| 467 | trunk | Survived |
| 468 | trunkextremities | Survived |
| 469 | Site not reported | Survived |
| 470 | whole body | Survived |
| 471 | face trunk extremities | Survived |
| 472 | Site not reported | Survived |
| 473 | Site not reported | Survived |
| 474 | Site not reported | Survived |
| 475 | trunkextremities | Survived |
| 476 | Site not reported | Survived |
| 477 | Site not reported | Survived |
| 478 | Site not reported | Survived |
| 479 | Site not reported | Survived |
| 480 | Site not reported | Survived |
| 481 | Site not reported | Survived |
| 482 | Site not reported | Survived |
| 483 | Site not reported | Survived |
| 484 | Site not reported | Survived |
| 485 | Site not reported | Survived |
| 486 | whole body | Survived |
| 487 | Site not reported | Survived |
| 488 | whole body | Survived |
| 489 | face trunk extremities | Survived |
| 490 | whole body | Survived |
| 491 | face trunk extremities | Survived |
| 492 | Site not reported | Survived |
| 493 | whole body | Survived |
| 494 | trunkextremities | Survived |
| 495 | trunkextremities | Survived |
| 496 | trunkextremities | Survived |
| 497 | whole body | Survived |
| 498 | facetrunkextremities | Survived |
| 499 | trunkextremities | Survived |
| 500 | trunkextremities | Survived |
| 501 | whole body | Survived |
| 502 | trunkextremities | Survived |
| 503 | facetrunkextremities | Survived |

****Table S4 Details of systemic corticosteroid regimens****

| **No.** | **Systemic steroid regimen (standardized)** | **Route (standardized)** | **Dose (as reported)** |
| --- | --- | --- | --- |
| 1 | Methylprednisolone | IV | dose not reported |
| 2 | Betamethasone | PO | dose not reported |
| 3 | Prednisolone | route not reported | 30 mg/d |
| 4 | Prednisolone | route not reported | dose not reported |
| 5 | Methylprednisolone | IV | 0.8 mg/kg/d |
| 6 | Methylprednisolone | IV | 40mg |
| 7 | Dexamethasone; Prednisone; Methylprednisolone | route not reported | 10 mg/d; 40 mg/d; 60 mg/d |
| 8 | Prednisolone | route not reported | 30 mg/d |
| 9 | Dexamethasone | PO | 0.06 mg/kg/d |
| 10 | Methylprednisolone | route not reported | 0.5 mg/kg/d |
| 11 | Methylprednisolone | IV | 60 mg/d |
| 12 | Methylprednisolone | IV | 60 mg |
| 13 | Prednisone; Methylprednisolone | IV; PO | dose not reported |
| 14 | Corticosteroid | route not reported | dose not reported |
| 15 | Corticosteroid | route not reported | dose not reported |
| 16 | Corticosteroid | route not reported | dose not reported |
| 17 | Corticosteroid | route not reported | dose not reported |
| 18 | Methylprednisolone | IV | 40 mg |
| 19 | Prednisone; Methylprednisolone | IV; PO | dose not reported |
| 20 | Prednisone; Corticosteroid | IV; PO | 0.8 mg/kg/d |
| 21 | Betamethasone; Dexamethasone | IV; PO | 4 mg |
| 22 | Corticosteroid | route not reported | dose not reported |
| 23 | Corticosteroid | route not reported | dose not reported |
| 24 | Prednisolone | route not reported | dose not reported |
| 25 | Prednisolone | route not reported | dose not reported |
| 26 | Prednisolone | route not reported | 30 mg |
| 27 | Methylprednisolone | IV | 60 mg |
| 28 | Methylprednisolone | IV | 40 mg |
| 29 | Corticosteroid | PO | dose not reported |
| 30 | Methylprednisolone | route not reported | 2 mg/kg/d |
| 31 | Dexamethasone; Betamethasone | IV | dose not reported |
| 32 | Prednisone | PO | 30 mg |
| 33 | Methylprednisolone | route not reported | 40 mg |
| 34 | Hydrocortisone | IV | 50 mg |
| 35 | Methylprednisolone | route not reported | dose not reported |
| 36 | Methylprednisolone | route not reported | 40 mg |
| 37 | Corticosteroid | route not reported | 0.5 mg/kg/d |
| 38 | Prednisone; Dexamethasone | PO | 100 mg; 50 mg; 4 mg/d |
| 39 | Methylprednisolone; Hydrocortisone; Prednisone | IV; PO | dose not reported |
| 40 | Prednisolone; Hydrocortisone; Betamethasone | route not reported | 1 mg |
| 41 | Prednisolone; Betamethasone | route not reported | 60 mg |
| 42 | Prednisolone; Betamethasone | PO | 1.0 mg/kg/d |
| 43 | Betamethasone; Prednisone | PO | 0.5 mg/kg/d |
| 44 | Prednisolone | PO | 20 mg/d |
| 45 | Methylprednisolone | IM | 60 mg/d |
| 46 | Prednisolone | IV | 1 mg/kg/d |
| 47 | Prednisolone | PO | 40 mg/d |
| 48 | Prednisone | PO | dose not reported |
| 49 | Methylprednisolone | IV | 40 mg/d |
| 50 | Prednisolone | PO | 30 mg/d |
| 51 | Methylprednisolone | IV | 60 mg/d |
| 52 | Methylprednisolone | route not reported | 60 mg/d |
| 53 | Methylprednisolone | IV | dose not reported |
| 54 | Prednisone | PO | 40 mg/d |
| 55 | Prednisone | PO | 40 mg |
| 56 | Dexamethasone | route not reported | 10 mg |
| 57 | Systemic corticosteroid | route not reported | dose not reported |
| 58 | Dexamethasone; Methylprednisolone; Prednisone | IV; PO | 10 mg/d; 80 mg/d; 75 mg/d |
| 59 | Methylprednisolone | route not reported | 60 mg/d; 160 mg/d |
| 60 | Methylprednisolone | route not reported | 40 mg/d |
| 61 | Prednisone | PO | dose not reported |
| 62 | Prednisone | route not reported | 40 mg/d |
| 63 | Prednisone | PO | 20 mg/d |
| 64 | Systemic corticosteroid | IV | 1 mg/kg/d |
| 65 | Prednisolone | IV | 1 mg/kg/d |
| 66 | Prednisolone | IV | 1 mg/kg/d |
| 67 | Methylprednisolone | route not reported | 40 mg/d |
| 68 | Methylprednisolone | route not reported | 40 mg bid |
| 69 | Prednisone | route not reported | 30 mg/d |
| 70 | Methylprednisolone | route not reported | 40 mg/d |
| 71 | Corticosteroid | route not reported | dose not reported |
| 72 | Prednisone | route not reported | 1 mg/kg/d |
| 73 | Prednisone | PO | 1 mg/kg/d |
| 74 | Corticosteroid | route not reported | dose not reported |
| 75 | Betamethasone; Prednisone | PO | 20 mg |
| 76 | Prednisolone | route not reported | 1 mg/kg/d |
| 77 | Corticosteroid | IV | dose not reported |
| 78 | Prednisone | route not reported | 60 mg |
| 79 | Prednisone | route not reported | 30 mg |
| 80 | Methylprednisolone | route not reported | 60 mg |
| 81 | Dexamethasone | IV | dose not reported |
| 82 | Prednisolone | PO | 2 mg/kg/d |
| 83 | Prednisolone | PO | 30 mg |
| 84 | Prednisone | PO | 20 mg |
| 85 | Prednisone | route not reported | 1 mg/kg/d |
| 86 | Prednisone | route not reported | 60 mg |
| 87 | Prednisone | route not reported | 1 mg/kg/d |
| 88 | Methylprednisolone | route not reported | 1 mg/kg/d |
| 89 | Prednisolone | route not reported | dose not reported |
| 90 | Prednisolone | PO | 30 mg |
| 91 | Corticosteroid | route not reported | dose not reported |
| 92 | Prednisolone | PO | 50 mg/d |
| 93 | Prednisone | PO | 40 mg/d |
| 94 | Prednisone | route not reported | dose not reported |
| 95 | Dexamethasone | IV | 3 mg q6h |
| 96 | Prednisolone | PO | 30 mg/d |
| 97 | Corticosteroid | PO | dose not reported |
| 98 | Prednisolone | PO | 50 mg/d |
| 99 | Corticosteroid | IV | dose not reported |
| 100 | Prednisone | route not reported | 40 mg |
| 101 | Methylprednisolone | IV | 60 mg |
| 102 | Prednisone | PO | 30 mg; 5 mg |
| 103 | Prednisone | PO | 0.5 mg/kg/d |
| 104 | Prednisone | route not reported | 120 mg |
| 105 | Systemic corticosteroid | route not reported | dose not reported |
| 106 | Prednisone | PO | 50 mg |
| 107 | Methylprednisolone | route not reported | 40 mg/d |
| 108 | Corticosteroid | route not reported | dose not reported |
| 109 | Methylprednisolone | route not reported | 0.6 mg/kg/d |
| 110 | Methylprednisolone | IV | 40 mg |
| 111 | Prednisone | PO | dose not reported |
| 112 | Corticosteroid | route not reported | dose not reported |
| 113 | Hydrocortisone | route not reported | 50 mg |
| 114 | Prednisolone | PO | dose not reported |
| 115 | Prednisone | PO | 0.3 mg/kg/d |
| 116 | Methylprednisolone | PO | dose not reported |
| 117 | Methylprednisolone; Betamethasone | IV | 125 mg/d |
| 118 | Systemic corticosteroid | route not reported | dose not reported |
| 119 | Corticosteroid | PO | dose not reported |
| 120 | Prednisone | route not reported | dose not reported |
| 121 | Prednisone | PO | 37.5 mg/d |
| 122 | Methylprednisolone | route not reported | 0.5 mg/kg/d |
| 123 | Prednisolone | route not reported | 8 mg/d |
| 124 | Systemic corticosteroid | IV | dose not reported |
| 125 | Prednisolone | IV | 40 mg/d |
| 126 | Systemic corticosteroid | route not reported | dose not reported |
| 127 | Prednisolone | route not reported | 0.3 mg/kg/d |
| 128 | Prednisolone; Prednisone | IV; PO | 125 mg |
| 129 | Prednisolone; Prednisone | PO | dose not reported |
| 130 | Betamethasone; Prednisone | PO | dose not reported |
| 131 | Prednisolone | PO | 1 mg/kg/d |
| 132 | Dexamethasone | route not reported | 2.5 mg/d |
| 133 | Prednisolone; Prednisone | IV; PO | 500 mg once |
| 134 | Prednisolone | IV; PO | 250 mg/d; 20 mg/d |
| 135 | Prednisone | PO | dose not reported |
| 136 | Prednisone | PO | dose not reported |
| 137 | Prednisolone; Prednisone | route not reported | dose not reported |
| 138 | Prednisone | PO | 50 mg; 25 mg |
| 139 | Prednisone | route not reported | dose not reported |
| 140 | Hydrocortisone | IV | 500 mg |
| 141 | Dexamethasone; Prednisolone | IV; PO | 16 mg/d; 30 mg/d |
| 142 | Betamethasone | PO | 16 mg/d; 8 mg/d |
| 143 | Prednisone | IV | 40 mg/d |
| 144 | Systemic corticosteroid | route not reported | dose not reported |
| 145 | Prednisolone | IV | dose not reported |
| 146 | Prednisolone | IV | 500 mg/d |
| 147 | Prednisolone | IV | 240 mg/d |
| 148 | Dexamethasone | IV | 10 mg/d |
| 149 | Prednisolone | PO | 30 mg/d |
| 150 | Prednisolone | PO | 30 mg/d |
| 151 | Prednisolone | PO | 20 mg/d |
| 152 | Prednisolone | route not reported | 40 mg/d |
| 153 | Prednisone | route not reported | 1 mg/kg/d |
| 154 | Prednisone | route not reported | 50 mg/d |
| 155 | Prednisone | IV | 40 mg |
| 156 | Prednisone | IV | 250 mg |
| 157 | Prednisone | route not reported | dose not reported |
| 158 | Systemic corticosteroid | PO | dose not reported |
| 159 | Prednisolone | PO | dose not reported |
| 160 | Prednisolone | PO | dose not reported |
| 161 | Prednisone | route not reported | 60 mg |
| 162 | Prednisone | route not reported | 25 mg/d |
| 163 | Prednisone | route not reported | 30 mg |
| 164 | Prednisone | route not reported | 0.5 mg/kg/d |
| 165 | Methylprednisolone | route not reported | 160 mg/d |
| 166 | Corticosteroid | route not reported | dose not reported |
| 167 | Corticosteroid | route not reported | dose not reported |
| 168 | Prednisolone | route not reported | 50 mg/d |
| 169 | Prednisolone | IV | 1 mg/kg/d |
| 170 | Prednisone | route not reported | dose not reported |
| 171 | Prednisone | IV | 125 mg |
| 172 | Methylprednisolone; Prednisone | IV; PO | 80 mg/d |
| 173 | Prednisolone | PO | 40 mg/d |
| 174 | Methylprednisolone | IV | 60 mg |
| 175 | Methylprednisolone | route not reported | 40 mg |
| 176 | Prednisolone | route not reported | 40 mg/d |
| 177 | Prednisone | PO | 80 mg/d |
| 178 | Methylprednisolone | PO | dose not reported |
| 179 | Systemic corticosteroid | route not reported | dose not reported |
| 180 | Prednisone | PO | 0.5 mg/kg/d |
| 181 | Prednisone | PO | 40mg |
| 182 | Prednisolone | PO | 40 mg/d |
| 183 | Methylprednisolone | IV | dose not reported |
| 184 | Hydrocortisone | IV | dose not reported |
| 185 | Prednisone | route not reported | 50 mg |
| 186 | Prednisone | route not reported | 50 mg |
| 187 | Prednisone | PO | 20 mg/d |
| 188 | Prednisolone | route not reported | 1.0 mg/kg/d |
| 189 | Methylprednisolone | IV | 100 mg |
| 190 | Methylprednisolone | IV | 60 mg |
| 191 | Prednisone | route not reported | dose not reported |
| 192 | Corticosteroid | route not reported | dose not reported |
| 193 | Prednisolone | PO | 25 mg/d |
| 194 | Methylprednisolone | IV | 120 mg |
| 195 | Methylprednisolone | IV | dose not reported |
| 196 | Methylprednisolone | route not reported | 80 mg/d |
| 197 | Methylprednisolone | IV | 40 mg |
| 198 | Prednisolone; Prednisone | IV; PO | 50 mg |
| 199 | Prednisolone | IV | 40 mg |
| 200 | Prednisolone | IV | 40 mg |
| 201 | Prednisolone | IV | 40 mg |
| 202 | Methylprednisolone; Prednisone | IV; PO | 125 mg/d |
| 203 | Prednisolone | PO | dose not reported |
| 204 | Prednisone | route not reported | 2 mg/kg/d |
| 205 | Prednisolone | IV | 1 mg/kg/d |
| 206 | Prednisone | route not reported | dose not reported |
| 207 | Betamethasone; Prednisolone | PO | 57.5 mg |
| 208 | Prednisolone; Methylprednisolone | PO | 25 mg |
| 209 | Methylprednisolone | route not reported | 0.5 mg/kg/d |
| 210 | Dexamethasone | route not reported | 8 mg |
| 211 | Hydrocortisone | IV | 100 mg |
| 212 | Methylprednisolone | route not reported | 20mg/d |
| 213 | Methylprednisolone | route not reported | 60 mg |
| 214 | Methylprednisolone; Prednisone | IV; PO | 40mg |
| 215 | Prednisone | PO | 30 mg/d |
| 216 | Methylprednisolone | IV | 32 mg/d |
| 217 | Dexamethasone | route not reported | dose not reported |
| 218 | Methylprednisolone sodium succinate | route not reported | dose not reported |
| 219 | Methylprednisolone sodium succinate | IV | 40 mg |
| 220 | Methylprednisolone sodium succinate | route not reported | 10 mg |
| 221 | Methylprednisolone sodium succinate | IV | 60 mg |
| 222 | Methylprednisolone sodium succinate | IV | 80 mg |
| 223 | Methylprednisolone | IV | 40 mg/d |
| 224 | Dexamethasone | IM | 5 mg |
| 225 | Methylprednisolone | IV | 40 mg/d |
| 226 | Dexamethasone | IV | 10 mg/d; 10 mg |
| 227 | Methylprednisolone sodium succinate | IV | 60 mg/d |
| 228 | Methylprednisolone | IV | 40 mg/d |
| 229 | Methylprednisolone sodium succinate | IV | 80 mg/d |
| 230 | Methylprednisolone sodium succinate | IV | 60 mg/d |
| 231 | Methylprednisolone | IV | 40 mg/d |
| 232 | Methylprednisolone | IV | 40 mg/d |
| 233 | Methylprednisolone | IV | 30 mg/d |
| 234 | Methylprednisolone | IV | 80 mg/d |
| 235 | Methylprednisolone | route not reported | 60 mg |
| 236 | Prednisone | PO | dose not reported |
| 237 | Dexamethasone | route not reported | 5 mg |
| 238 | Methylprednisolone | route not reported | 40 mg |
| 239 | Prednisone | route not reported | 50 mg |
| 240 | Dexamethasone | route not reported | 5 mg |
| 241 | Methylprednisolone | route not reported | 40 mg |
| 242 | Methylprednisolone | route not reported | 30 mg |
| 243 | Dexamethasone | route not reported | 4 mg |
| 244 | Methylprednisolone | route not reported | 60 mg |
| 245 | Methylprednisolone | route not reported | 80 mg |
| 246 | Methylprednisolone | route not reported | 40 mg |
| 247 | Methylprednisolone | route not reported | 40 mg |
| 248 | Methylprednisolone | IV | 40 mg/d; 120 mg/d |
| 249 | Dexamethasone | IV | 5 mg/d |
| 250 | Dexamethasone | IV | 5 mg/d |
| 251 | Methylprednisolone | IV | 40 mg/d |
| 252 | Methylprednisolone | IV | dose not reported |
| 253 | Prednisone | route not reported | 1.5 mg/kg/d |
| 254 | Prednisone | route not reported | 1.6 mg/kg/d |
| 255 | Prednisone | route not reported | 1.7 mg/kg/d |
| 256 | Prednisone | route not reported | 1.8 mg/kg/d |
| 257 | Prednisone | route not reported | 1.9 mg/kg/d |
| 258 | Prednisone | route not reported | 1.10 mg/kg/d |
| 259 | Prednisone | route not reported | 1.11 mg/kg/d |
| 260 | Prednisone | route not reported | 1.12 mg/kg/d |
| 261 | Prednisone | route not reported | 1.13 mg/kg/d |
| 262 | Methylprednisolone | IV | 60 mg/d |
| 263 | Methylprednisolone | IV | 40 mg/d |
| 264 | Prednisone | route not reported | 40 mg/d |
| 265 | Hydrocortisone | IV | 500 mg/d |
| 266 | Methylprednisolone | IV | 40 mg/d |
| 267 | Hydrocortisone | IV | 100 mg/d |
| 268 | Corticosteroid | route not reported | dose not reported |
| 269 | Corticosteroid | route not reported | dose not reported |
| 270 | Dexamethasone | IV | 5 mg/d |
| 271 | Dexamethasone | IV | 5 mg |
| 272 | Hydrocortisone | IV | dose not reported |
| 273 | Dexamethasone | IV | 10 mg/d |
| 274 | Dexamethasone | IV | 10 mg/d |
| 275 | Methylprednisolone | IV | 0.68 mg/kg/d |
| 276 | Methylprednisolone | IV | 0.86 mg/kg/d |
| 277 | Methylprednisolone | IV | 0.83 mg/kg/d |
| 278 | Methylprednisolone | IV | 1.01 mg/kg/d |
| 279 | Methylprednisolone | IV | 1.97 mg/kg/d |
| 280 | Methylprednisolone | IV | 0.94 mg/kg/d |
| 281 | Methylprednisolone | IV | 1.09 mg/kg/d |
| 282 | Methylprednisolone | IV | 1.05 mg/kg/d |
| 283 | Methylprednisolone | IV | 1.20 mg/kg/d |
| 284 | Methylprednisolone | IV | 1.25 mg/kg/d |
| 285 | Methylprednisolone | IV | 0.80 mg/kg/d |
| 286 | Methylprednisolone | IV | 0.80 mg/kg/d |
| 287 | Methylprednisolone | IV | 1.41 mg/kg/d |
| 288 | Methylprednisolone | IV | 0.85 mg/kg/d |
| 289 | Methylprednisolone | IV | 0.40 mg/kg/d |
| 290 | Methylprednisolone | IV | 1.09 mg/kg/d |
| 291 | Methylprednisolone | IV | 0.78 mg/kg/d |
| 292 | Methylprednisolone | IV | 0.80 mg/kg/d |
| 293 | Methylprednisolone | IV | 0.80 mg/kg/d |
| 294 | Methylprednisolone | IV | 0.77 mg/kg/d |
| 295 | Methylprednisolone | IV | 0.67 mg/kg/d |
| 296 | Methylprednisolone | IV | 0.71 mg/kg/d |
| 297 | Methylprednisolone | IV | 0.92 mg/kg/d |
| 298 | Methylprednisolone | IV | 0.91 mg/kg/d |
| 299 | Methylprednisolone | IV | 1.50 mg/kg/d |
| 300 | Methylprednisolone | IV | 1.02 mg/kg/d |
| 301 | Methylprednisolone | IV | 1.13 mg/kg/d |
| 302 | Methylprednisolone | IV | 1.15 mg/kg/d |
| 303 | Methylprednisolone | IV | 0.80 mg/kg/d |
| 304 | Methylprednisolone | IV | 1.02 mg/kg/d |
| 305 | Methylprednisolone | IV | 0.95 mg/kg/d |
| 306 | Methylprednisolone | IV | 1.02 mg/kg/d |
| 307 | Methylprednisolone | IV | 1.13 mg/kg/d |
| 308 | Methylprednisolone | IV | 0.80 mg/kg/d |
| 309 | Methylprednisolone | IV | 1.07 mg/kg/d |
| 310 | Methylprednisolone | IV | 0.75 mg/kg/d |
| 311 | Methylprednisolone | IV | 0.91 mg/kg/d |
| 312 | Methylprednisolone | IV | 1.32 mg/kg/d |
| 313 | Methylprednisolone | IV | 1.04 mg/kg/d |
| 314 | Methylprednisolone | IV | 1.09 mg/kg/d |
| 315 | Methylprednisolone | IV | 0.91 mg/kg/d |
| 316 | Methylprednisolone | IV | 0.63 mg/kg/d |
| 317 | Methylprednisolone | IV | 1.58 mg/kg/d |
| 318 | Methylprednisolone | IV | 0.95 mg/kg/d |
| 319 | Methylprednisolone | IV | 0.77 mg/kg/d |
| 320 | Methylprednisolone | IV | 0.80 mg/kg/d |
| 321 | Methylprednisolone | IV | 0.75 mg/kg/d |
